# Supplementary material
Source: PubMed Central journal article supplement (PMC10366947)
Supplement: jama-e2312951-s002.pdf [file jama-e2312951-s002.pdf]

## **Data Sharing Statement**

Myerson. Insulin Fills by Medicare Enrollees and Out-of-Pocket Caps Under the Inflation Reduction Act. *JAMA*. Published July 24, 2023. doi:10.1001/jama.2023.12951

### **Data**

**Data available:** No

### **Additional Information**

**Explanation for why data not available:** These are proprietary data from IQVIA.
